# Supplementary material
Source: PubMed Central journal article supplement (PMC8400845)

# Histogram of BTEX model parameters on tested data cohort

## Stress

## Rest

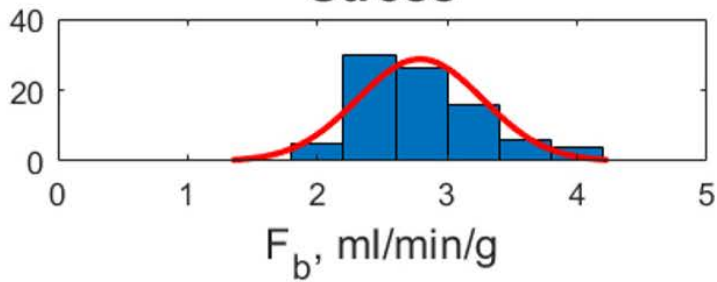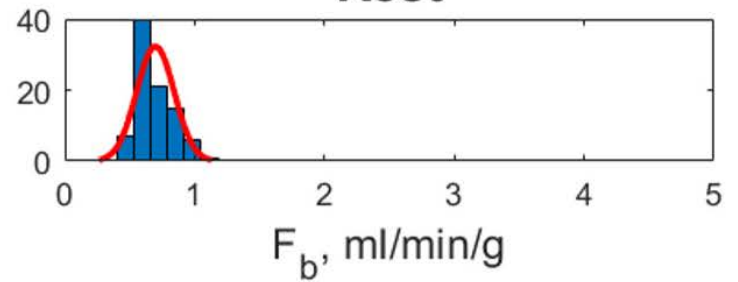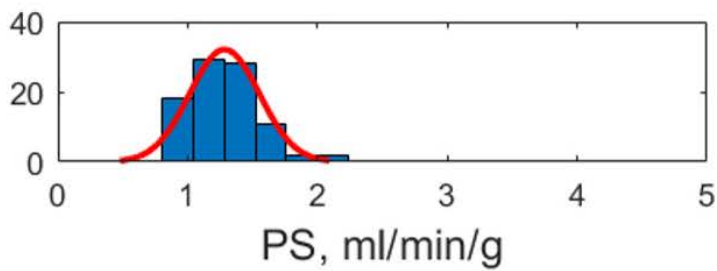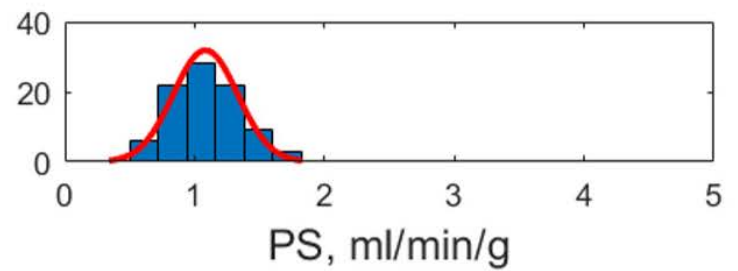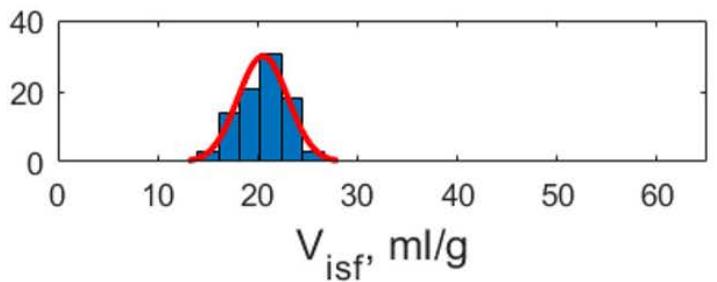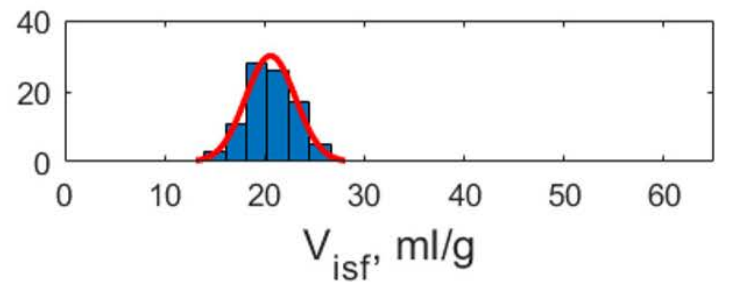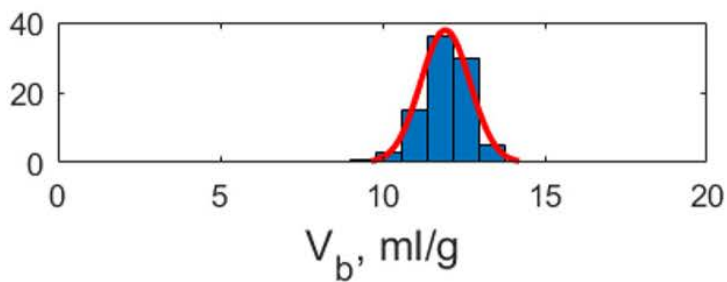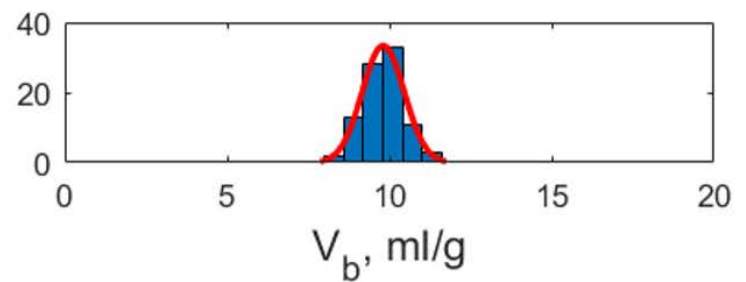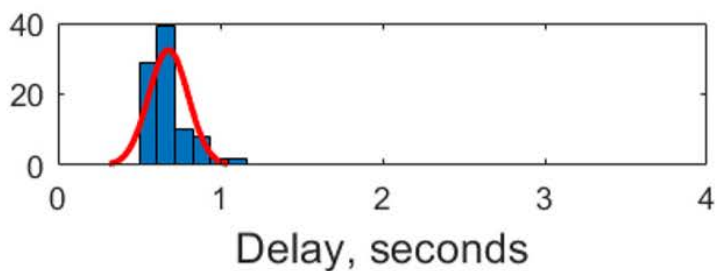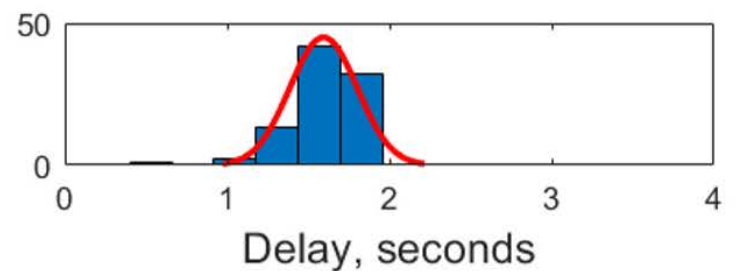

Supplement: NIHMS1725805-supplement-fS1.pdf [file NIHMS1725805-supplement-fS1.pdf]
